# Supplementary material
Source: PubMed Central journal article supplement (PMC6050061)
Supplement: AET2-2-195-s001.pdf [file AET2-2-195-s001.pdf]

**Data Supplement S1. Interview Instrument**  
**Needs Assessment: Semi-Structured Interviews**

| <b>Questions</b>                                                                                                                                   | <b>Notes</b> |
|----------------------------------------------------------------------------------------------------------------------------------------------------|--------------|
| How do you feel about your personal finance knowledge and skills?                                                                                  |              |
| Who manages your finances?<br><br>Do you receive any help managing your finances?<br><br>Please comment generally on how you manage your finances. |              |
| What is the best financial decision or action that you have made in the last five years?                                                           |              |
| What is the worst financial mistake that you have made in the last five years?                                                                     |              |
| What concerns you most financially?                                                                                                                |              |

**Data Supplement S1. Interview Instrument**  
**Needs Assessment: Semi-Structured Interviews**

|                                                                                                                                                                                                                                                                                                                                                            |  |
|------------------------------------------------------------------------------------------------------------------------------------------------------------------------------------------------------------------------------------------------------------------------------------------------------------------------------------------------------------|--|
| <p>Please comment on your level of knowledge regarding _____.</p> <p>If applicable:<br/>Please also comment on your experience with and/or approach to _____.</p> <p>Topics:</p> <ul style="list-style-type: none"><li>- Student loans</li><li>- Retirement planning</li><li>- Investing</li><li>- Disability insurance</li><li>- Life insurance</li></ul> |  |
| <p>What do you feel are the most important things you need to learn about personal finance?</p>                                                                                                                                                                                                                                                            |  |
| <p>Please comment on whether you believe you would benefit from a curriculum on personal finance for residents.</p> <p>Please comment on ideal format for this curriculum (e.g. web-based, live, asynchronous, etc.)</p>                                                                                                                                   |  |
